# Supplementary material for: A Novel NIR-FRET Biosensor for Reporting PS/γ-Secretase Activity in Live Cells
Source: MDPI journal article supplement (doi:10.3390/s20215980), 2020-10-22
Supplement: s1 [file s1]

## **Supporting information**

### **A novel NIR-FRET biosensor for reporting PS/ $\gamma$ -secretase activity in live cells**

Mei CQ Houser, Steven S Hou, Florian Perrin, Yuliia Turchyna, Brian J Bacskai, Oksana Berzovska, Masato Maesako\*

Alzheimer Research Unit, MassGeneral Institute for Neurodegenerative Disease, Massachusetts General Hospital, Harvard Medical School, 114, 16th street, Charlestown, MA 02129

#### **\*Corresponding Author**

Masato Maesako, PhD (MMAESAKO@mgh.harvard.edu)

## Supplemental Figure 1

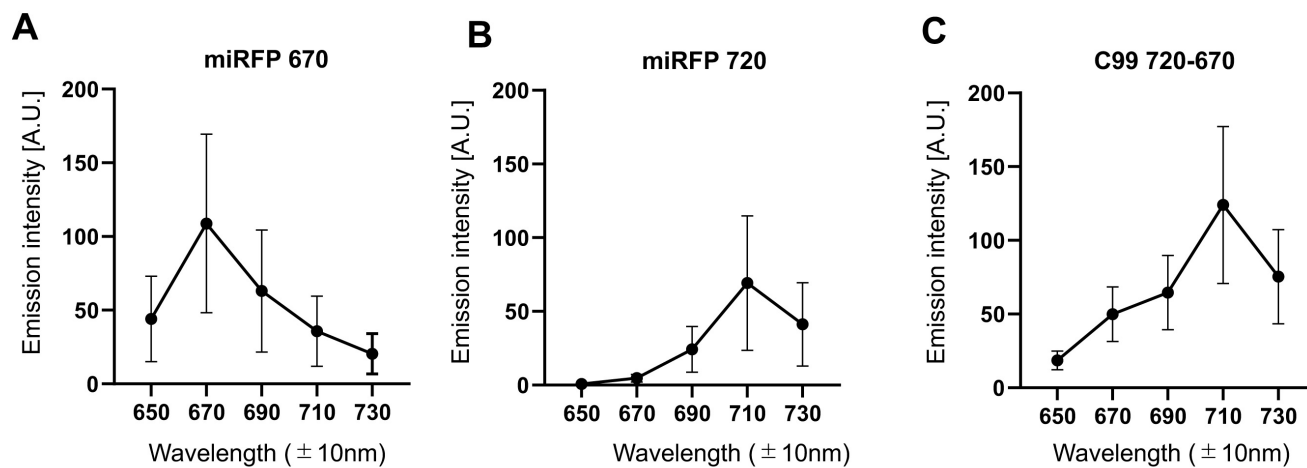

**Figure S1. Emission fluorescence spectral properties:** CHO cells expressing miRFP670 (A), miRFP720 (B), or the C99 720-670 biosensor (C) were excited by a 640nm laser. Fluorescence emission intensity within 650-730±10nm was measured (n = 30 cells). Mean ± SD

## Supplemental Figure 2

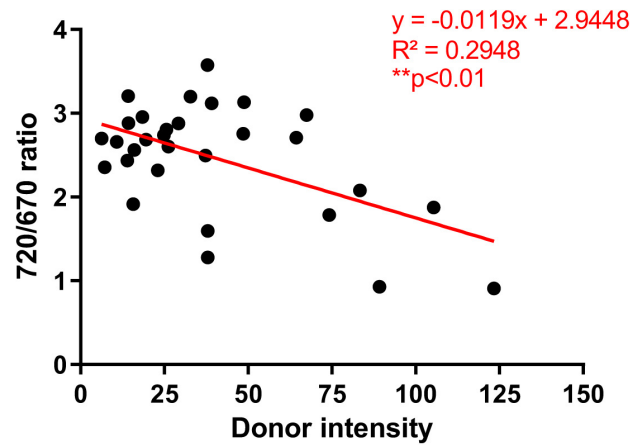

**Figure S2. Correlation between the 720/670 ratio and C99 720-670 probe expression level:** Correlation analysis between the 720/670 ratio (corresponding to Fig. 2A and 2B) and miRFP670 donor emission intensity (which reflects the biosensor expression level in the cell) shows a negative correlation. This indicates that higher 720/670 ratio does not come from higher biosensor expression. n = 30 cells, Pearson correlation coefficient,  $y = -0.0119x + 2.9448$ ,  $R^2 = 0.2948$ ,  $p = 0.0019$
